# Supplementary material for: Toward deep observation: A systematic survey on artificial intelligence techniques to monitor fetus via ultrasound images
Source: PubMed Central journal article supplement — iScience. 2022 Jul 3;25(8):104713. doi: 10.1016/j.isci.2022.104713 (PMC9287600; doi:10.1016/j.isci.2022.104713), 2022-07-03
Supplement: mmc1.pdf [file mmc1.pdf]

**iScience, Volume 25**

**Supplemental information**

**Toward deep observation: A systematic  
survey on artificial intelligence techniques  
to monitor fetus via ultrasound images**

**Mahmood Alzubaidi, Marco Agus, Khalid Alyafei, Khaled A. Althelaya, Uzair Shah, Alaa Abd-Alrazaq, Mohammed Anbar, Michel Makhoulouf, and Mowafa Househ**

# Towards deep observation: A systematic survey on artificial intelligence techniques to monitor fetus via Ultrasound Images

Mahmood Alzubaidi<sup>1,4\*</sup>, Marco Agus<sup>1</sup>, Khalid Alyafei<sup>2,3</sup>, Khaled A Althelaya<sup>1</sup>, Uzair Shah<sup>1</sup>, Alaa A. Abd-Alrazaq<sup>1</sup>, Mohammed Anbar<sup>3</sup>, Michel Makhlouf<sup>2</sup>, And Mowafa Househ<sup>1\*</sup>

**Table S1 Data extraction form that used to perform data extraction for the included studies, Related to Table 1 and Table 2**

| <b>Concept</b>                                                                 | <b>Definition</b>                                                                                                      |
|--------------------------------------------------------------------------------|------------------------------------------------------------------------------------------------------------------------|
| 1. <b>paper</b>                                                                | Paper name                                                                                                             |
| 2. <b>Country</b>                                                              | Country where the study was published                                                                                  |
| 3. <b>University</b>                                                           | University where the study was published                                                                               |
| 4. <b>journal or conference</b>                                                | The paper type (i.e., peer-reviewed, conference ).                                                                     |
| 5. <b>Year</b>                                                                 | The year in which the study was submitted.                                                                             |
| 6. <b>Objective</b>                                                            | The main objectives of the study                                                                                       |
| 7. <b>Main Organ</b>                                                           | The target organ of the fetal                                                                                          |
| 8. <b>Target fetal part (head, heart) when applicable</b>                      | Target part in the organ of the fetal                                                                                  |
| 9. <b>Target Health issue (disease) when applicable</b>                        | Target health issue or disease                                                                                         |
| 10. <b>US image dimensional (2D, 3D, 4D)</b>                                   | Type of ultrasound that utilized in the study                                                                          |
| 11. <b>Aim (Regression, Object detection, Segmentation and Classification)</b> | AI task that implemented                                                                                               |
| 12. <b>AI Branch (Machine learning or Deep learning)</b>                       | AI branch that adopted by the study                                                                                    |
| 13. <b>Classification/segmentation / regression model (CNN, SVM, RNN)</b>      | What kind network architecture were trained                                                                            |
| 14. <b>Feature extraction method/ optimization</b>                             | Is there any feature extraction method used to enhance the model or any optimization method were reported in the study |
| 15. <b>Fetal age</b>                                                           | Gestational age of the fetal                                                                                           |
| 16. <b>Ultrasound machine model</b>                                            | Type of the ultrasound machine that used to scan the fetal                                                             |
| 17. <b>Dataset source (public, private)</b>                                    | Is the dataset available or private                                                                                    |
| 18. <b>Dataset link (Kaggle link, research center, university hub)</b>         | Where is the location of the dataset in case its public                                                                |
| 19. <b>Dataset volume</b>                                                      | How is the volume of the dataset                                                                                       |
| 20. <b>Training dataset</b>                                                    | What is training set                                                                                                   |
| 21. <b>validation dataset</b>                                                  | What is validation set                                                                                                 |
| 22. <b>Testing dataset</b>                                                     | What is Testing set                                                                                                    |
| 23. <b>Evaluation metrics</b>                                                  | Performance metrics that used to evaluate the model                                                                    |
| 24. <b>Result</b>                                                              | Result of each study                                                                                                   |
| 25. <b>Future Work</b>                                                         | Future work of each study                                                                                              |
| 26. <b>link code</b>                                                           | Link to code if available                                                                                              |
| 27. <b>Observation for reader</b>                                              | Report any observation for the easier for each study                                                                   |
